# Supplementary material
Source: publisher site journal article supplement (https://www.dovepress.com/article/348690)
Supplement: Supplementary file 1 [file get_supplementary_file.php]

**A**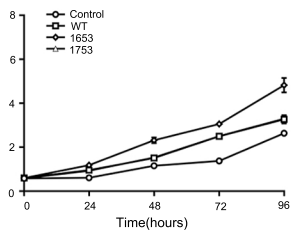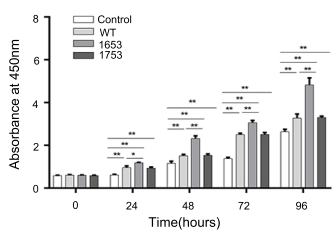**B**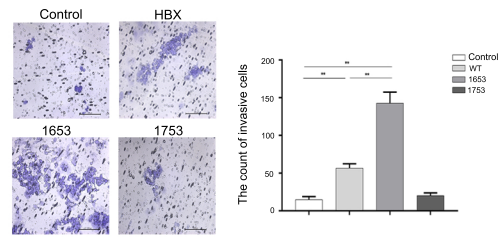**C**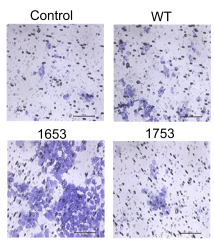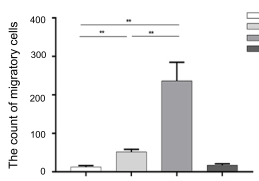**D**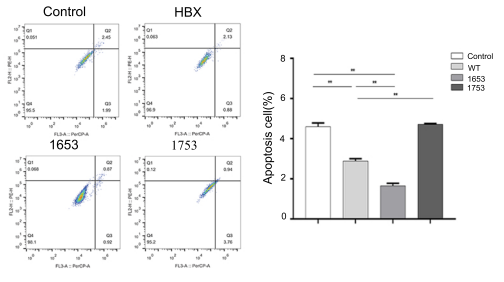

Fig. S1. The functional analysis indicated that C1653T mutation enhanced the malignancy of Huh7 cells.

(A) CCK-8 assay for Control, HBX, 1653 and 1753 groups. (B) Cell invasion assay for Control, HBX, 1653 and 1753 groups. (C) Cell migration assay for Control, HBX, 1653 and 1753 groups. (D) Flow cytometry assay for Control, HBX, 1653 and 1753 groups. \*\*P<0.01, \*P<0.05.

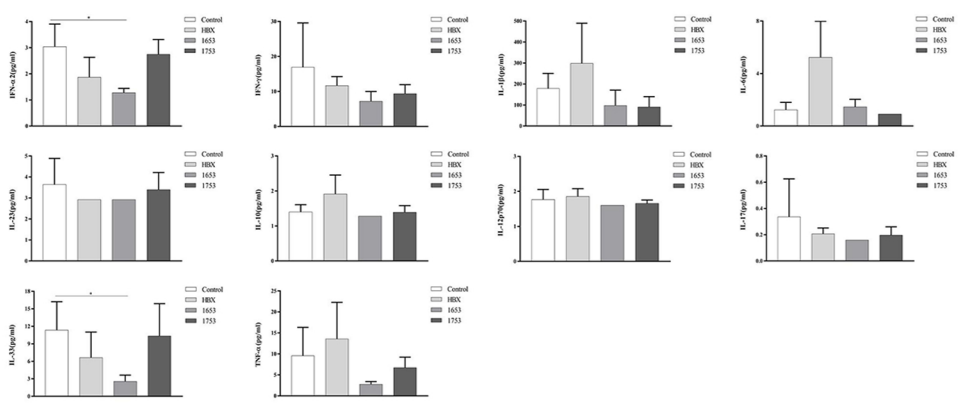

Fig. S2. Measurement of other cytokines levels. Cytokines levels of IFN- $\alpha$ 2, INF- $\gamma$ , TNF- $\alpha$ , IL-1 $\beta$ , IL-6, IL-10, IL-12p70, IL-17A, IL-23 and IL-33 in Control, HBX, 1653 and 1753 groups. \*\*P<0.01, \*P<0.05.
